# 1 **A quick and easy way to estimate entropy and mutual information** 2 **for neuroscience**

3 Mickael Zbili<sup>1,2</sup>, Sylvain Rama<sup>3\*</sup>

4 <sup>1</sup>, Lyon Neuroscience Research Center, INSERM U1028-CNRS UMR5292-Université Claude Bernard Lyon1, Lyon,  
5 France

6 <sup>2</sup>, Now in Blue Brain Project, École polytechnique fédérale de Lausanne (EPFL) Biotech Campus, Geneva,  
7 Switzerland.

8 <sup>3</sup>, UCL Queen Square Institute of Neurology, University College London, London, United Kingdom.

9 \*, Correspondence: Sylvain Rama, s.rama@ucl.ac.uk

## 10 **Abstract**

11 Calculations of entropy of a signal or mutual information between two variables are valuable  
12 analytical tools in the field of neuroscience. They can be applied to all types of data, capture  
13 nonlinear interactions and are model independent. Yet the limited size and number of recordings  
14 one can collect in a series of experiments makes their calculation highly prone to sampling bias.  
15 Mathematical methods to overcome this so called “sampling disaster” exist, but require  
16 significant expertise, great time and computational costs. As such, there is a need for a simple,  
17 unbiased and computationally efficient tool for reliable entropy and mutual information  
18 estimation. In this paper, we propose that application of entropy-coding compression algorithms  
19 widely used in text and image compression fulfill these requirements. By simply saving the  
20 signal in PNG picture format and measuring the size of the file on the hard drive, we can reliably  
21 estimate entropy through different conditions. Furthermore, with some simple modifications of  
22 the PNG file, we can also estimate mutual information between a stimulus and the observed  
23 responses into multiple trials. We show this using White noise signals, electrophysiological  
24 signals and histological data. Although this method does not give an absolute value of entropy or  
25 mutual information, it is mathematically correct, and its simplicity and broad use make it a  
26 powerful tool for their estimation through experiments.

## 27 **1 Introduction**

28 Entropy is the major component of information theory, conceptualized by Shannon in 1948  
29 (Shannon, 1948). It is a dimensionless quantity representing uncertainty about the state of a  
30 continuous or discrete system or a collection of data. It is highly versatile as it applies to many  
31 different types of data, it can capture nonlinear interactions, and is model independent (Cover  
32 and Thomas, 2006). It has been widely used in the field of neurosciences, see (Borst and  
33 Theunissen, 1999; Timme and Lapish, 2018) for a more complete review of work; for example  
34 in the field of synaptic transmission (London et al., 2002), information rate of Action Potentials

35 (APs) (Bialek et al., 1991; Juusola and de Polavieja, 2003; Street, 2020) or connectivity studies  
36 (Ito et al., 2011; Vicente et al., 2011).

37

38 However, estimating the entropy of a signal can be a daunting task. The entropy  $H$  of a signal  $X$   
39 is calculated with the well-known Shannon's formula:

$$40 \quad H(X) = -\sum_{i=1}^N p(x_i) \log_2 p(x_i) \quad (\text{eq.1})$$

41 Where  $p(x_i)$  is the probability that the signal will take the  $x_i$  configuration in the probability  
42 distribution  $(x_1, x_2, x_3, \dots, x_N)$  of the signal. It is considered that if  $p(x_i) = 0$ , then  
43  $p(x_i) \log_2 p(x_i) = 0$ , as  $\lim_{x \rightarrow 0} x (\log_2 x) = 0$ . And using a base 2 logarithm, entropy will be  
44 expressed in bits (Cover and Thomas, 2006; Shannon, 1948).

45 However, correctly estimating a probability distribution works only if each configuration  
46 happens many times. And by definition, one cannot know beforehand the number of needed  
47 experiments. This recording bias is even amplified by the fact that without making assumptions,  
48 there is no way to determine the relevant quantization and sampling of the data. The same  
49 recordings could be divided in any quantization bins and sampled by any interval, all giving  
50 different probability distributions and thus different entropy values.

51 As an example, let us consider the chain of characters  $A="04050405"$ . It is unchanged with a  
52 quantization range " $v$ " of 5, but will become "01010101" with a quantization range " $v$ " of 2. If  
53 we now sample it with a bin " $T$ " of 1 character, this will give a probability distribution of:  $p(0) =$   
54  $0.5$ ,  $p(4) = p(5) = 0.25$  in the first scenario ( $v = 5$ ) and:  $p(0) = p(1) = 0.5$  in the second scenario  
55 ( $v = 2$ ). We thus obtain different entropy values in the two scenarios:  $H^{v=5, T=1} = 1.5$   
56 and  $H^{v=2, T=1} = 1$ . Now, if we take a sampling bin of  $T = 2$  we obtain  $p(04) = p(05) = 0.5$  for  $v$   
57  $= 5$  and  $p(01) = 1$  for  $v = 2$ . The calculated entropies thus are:  $H^{v=5, T=2} = 1$  and  $H^{v=2, T=2} =$   
58  $0$ .

59 Without making assumptions on the data, there is no way to determine which value of entropy is  
60 the correct one. Therefore, quantization and sampling are crucial to determine the entropy of a  
61 signal. In an ideal case, we would need a method able to correct for the sample bias without  
62 making assumptions about the signal, meaning for any length of acquisition, any binning of  
63 width " $T$ " and any quantization level " $v$ " of the recorded data.

64 Thankfully there are multiple ways to use the direct formula and compensate for this bias, but  
65 none of them can be called trivial. There are for example the quadratic extrapolation method  
66 (Juusola and de Polavieja, 2003; de Polavieja et al., 2005; Strong et al., 1998), the Panzeri-  
67 Treves Bayesian estimation (Panzeri and Treves, 1996), the Best Universal Bound estimation  
68 (Paninski, 2003), the Nemenman-Shafee-Bialek method (Nemenman et al., 2004) or some more  
69 recent methods using statistic copulas (Ince et al., 2017; Safaai et al., 2018). Each method has its

70 advantages and downsides (see (Panzeri et al., 2007) for a comparison of some of them), which  
71 leaves the experimenter puzzled and in dire need of a mathematician (Borst and Theunissen,  
72 1999; Magri et al., 2009; Timme and Lapish, 2018).

73 However, there is another way to calculate the entropy of a signal, through what is called the  
74 Source Coding Theorem (Cover and Thomas, 2006; Larsson, 1996, 1999; Shannon, 1948;  
75 Wiegand, 2010) that to our knowledge has been used only once in the field of neurosciences, by  
76 (London et al., 2002) to calculate the information efficacy of a given synapse.

77 In signal processing, data compression is the process of encoding information using fewer bits  
78 than the original representation. In case of lossless compression, it does so by sorting parts of the  
79 signal by their redundancy and replacing them by shorter code words (Huffman, 1952; Shannon,  
80 1948). However, the source coding theorem specifies that it is impossible to compress a signal of  
81 size  $N$  such that the length of the compressed signal is smaller than the entropy of the original  
82 signal multiplied by  $N$ . Therefore, with a perfect compression method the size of the compressed  
83 signal is proportional to the original signal entropy (Cover and Thomas, 2006; Larsson, 1996,  
84 1999; Shannon, 1948; Wiegand, 2010).

85 When choosing this way of calculating entropy, the choice of the compression algorithm thus  
86 become critical as the compressed signal must be the smallest possible in order to represent the  
87 entropy of the original signal. It is of course possible to craft its own compression algorithm (see  
88 (London et al., 2002)), but thankfully this application has been broadly used in the domain of  
89 informatics, in order to compress text and images efficiently on the hard drive of a computer or  
90 before sending data through a network. In particular, this led to the development of two principal  
91 entropy-coding compression algorithms: the Huffman coding algorithm (Huffman, 1952) and the  
92 the Lempel–Ziv–Storer–Szymanski algorithm (Storer and Szymanski, 1982), both used to  
93 compress text and image files.

94 Portable Network Graphics (or PNG, see specifications at <https://www.w3.org/TR/PNG/> or  
95 <http://www.libpng.org/pub/png/>) is a graphic file format supporting lossless data compression.  
96 Its high versatility and fidelity made it widely used for saving and displaying pictures. Its lossless  
97 compression is based on the combination of the Lempel–Ziv–Storer–Szymanski and Huffman  
98 algorithms and is called DEFLATE (Deutsch, 1996). Its great efficacy made it a reference for  
99 comparison with other entropy-encoding image compression methods (Bian et al., 2019; Cover  
100 and Thomas, 2006; Hou et al., 2020; Mentzer et al., 2020) and it is even used directly to estimate  
101 image entropy (Wagstaff and Corsetti, 2010).

102 In this paper, we propose that measurement of PNG file output size of neuroscientific data  
103 compressed using the PNG DEFLATE algorithm (in Bytes on the hard drive) is a reliable and  
104 unbiased proxy to estimate the entropy of different neuronal variables. From this simple step and  
105 by applying this method to electrophysiological and histological data we show that output data  
106 file size and entropy are related in a linear fashion and are robust enough to estimate entropy

107 changes in response to different conditions. Further, with minimal modifications of the PNG file,  
108 we validate estimation of the mutual information between a stimulation protocol and the  
109 resulting experimental recording.

## 110 2 Materials and Methods

### 111 1 Neuronal modeling

112 A single compartment model was simulated with NEURON 7.7  
113 (<https://www.neuron.yale.edu/neuron/>). All simulations were run with 100- $\mu$ s time steps and had  
114 duration of 5 seconds. The nominal temperature was 37°C. The voltage dependence of activation  
115 and inactivation of Hodgkin-Huxley-based conductance models were taken from (Hu et al., 2009)  
116 for  $g_{\text{Nav}}$  and  $g_{\text{KDR}}$ . The equilibrium potentials for  $\text{Na}^+$ ,  $\text{K}^+$ , and passive channels were set to +60,  
117 -90 and -77 mV, respectively. The conductances densities were set to 0.04 S/cm<sup>2</sup>, 0.01 S/cm<sup>2</sup>  
118 and  $3.33 \cdot 10^{-5}$  S/cm<sup>2</sup> for  $g_{\text{Nav}}$  and  $g_{\text{KDR}}$  and passive channels, respectively. The model was  
119 stimulated using various numbers of excitatory synapses using the AlphaSynapse PointProcess  
120 of the NEURON software. The time constant and reversal potential were the same for every  
121 synapses and were set to 0.5 ms and 0 mV, respectively. The size of EPSPs produced by the  
122 synapses were randomly chosen using a lognormal distribution of EPSPs amplitude  
123 experimentally described in L5 pyramidal neurons (Lefort et al., 2009). Each synapse stimulated  
124 the model once during a simulation and the time onset was randomly chosen.

125 For the simulations of Figures 3A and 3B, the number of synapses simulating the model  
126 depended on the spiking frequency desired. For example, to calculate the information rate in the  
127 case of a 1 Hz spike train, we simulated the model with 400 of the synapses described above. We  
128 ran 20 trials of the simulation with the same train of synapses (Figure 2A). In order to introduce  
129 some jitter in the spiking times, we also injected a small gaussian current with a mean of 0 nA  
130 and a standard deviation of 0.0005 nA during the 5 seconds of the simulation. We reproduced  
131 this whole protocol for others desired spiking frequency, using increasing number of synapses  
132 (for example: 1900 synapses for a 19 Hz spiking).

133 For the simulations of Figure 3C, we stimulated the model with 750 of the synapses described  
134 above to get a spiking frequency around 5Hz. The time onsets and the amplitude of the synapses  
135 were randomly chosen at each simulation. We also added one supplementary synapse (Syn\_supp)  
136 which stimulates the model every 200 ms (i.e 25 times in 5 s). The size of the EPSP size  
137 produced by this synapse was called wSyn\_supp. When wSyn\_supp was weak, this synapse did  
138 not drive the spiking of the model (Figure 3C, up left). When wSyn\_supp was strong, this  
139 synapse drove the spiking of the model (Figure 3C, down left). We ran 100 simulations for each  
140 wSyn\_supp.

## 141 2 Direct calculation of information rate via the quadratic extrapolation method

142 We calculated the entropy and information rates using the direct method and quadratic  
143 extrapolation, as described by (Juusola and de Polavieja, 2003; Panzeri et al., 2007; de Polavieja  
144 et al., 2005; Strong et al., 1998).

145 The first step of this method is to calculate the different values of entropy of the signal with  
146 different portions “Size” of the signal, different quantizations “v” of the signal values and  
147 different samplings bin “T”. As described in the introduction, each modification of “Size”, “v” or  
148 “T” will give a different value for the entropy. For example, in figures 3A and B, the parameter  
149 “Size” was successively set as 1, 0.9, 0.8, 0.7, 0.6, 0.5; “v” successively set as 2, 4, 8, 16, 32, 64,  
150 128, 256 and the parameter “T” was successively set as 1, 2, 3, 4, 5, 6, 7, 8, which produced 6 \*  
151 8 \* 8 = 384 distinct values of entropy for every trial. Entropy values for different trials of the  
152 same condition were averaged together. These values were then plotted against 1/Size and the  
153 intersections to 0 estimated by quadratic fit of the data. This gave us the entropy values for every  
154 “v” and “T”, corrected for infinite size of the recordings. These values were then quadratic fitted  
155 against 1/v. The intersection to 0 gave us entropy values for every parameters of “T”, corrected  
156 for infinite Size and infinite number of bins “v”. Finally, these new values were fitted against 1/T  
157 and the extrapolation to 0 was estimated, to obtain the entropy value for infinite Size of the  
158 signals, infinite number of quantization levels “v” and infinite number of combination bins “T”  
159 (example in Fig. 1B). By performing this triple extrapolation and dividing by the time sampling,  
160 we can estimate the entropy rate R of the signal for theoretical infinite size, infinite number of  
161 quantization levels and infinite combination of sampling bins as

$$R = \lim_{T \rightarrow \infty} \frac{1}{T} \lim_{T \rightarrow \infty} \lim_{T \rightarrow \infty} H^{T,v,Size}$$

162 To obtain  $R_N$ , the entropy rate of the noise, instead of calculating H along the length of the signal,  
163 we did it at every time point across the successive trials. This is equivalent to simply transpose  
164 the signal and re-applying the same method than for  $R_S$ . Finally, we obtained the information rate  
165 by subtracting  $R_N$  to  $R_S$  as

$$R = R_S - R_N = \lim_{T \rightarrow \infty} \frac{1}{T} \lim_{v \rightarrow \infty} \lim_{Size \rightarrow \infty} (H_S^{T,v,Size} - H_N^{T,v,Size})$$

166 For Figure 3A, simulated recordings were down-sampled to 10 kHz before calculation of  
167 information rate. For Figure 3C, middle, simulated recordings were down-sampled to 3 kHz and  
168 binned as 0 & 1 depending of the presence of Action Potentials or not, similar to (London et al.,  
169 2002).

170 For figures 1B, 1C, 1D, 2, 3A and 3B, The parameter “Size” was successively set as 1, 0.9, 0.8,  
171 0.7, 0.6, 0.5; “v” successively set as 2, 4, 8, 16, 32, 64, 128, 256 and the parameter “T” was  
172 successively set as 1, 2, 3, 4, 5, 6, 7, 8. For figure 3C, the parameter “Size” was successively set

173 as 1, 0.9, 0.8, 0.7, 0.6, 0.5; “v” set as 2 and the parameter “T” was successively set as 1, 2, 5, 10,  
174 20, 30, 40.  $R_S$ ,  $R_N$  and Information rate were calculated by successive quadratic extrapolations,  
175 as described above.

176 All of this was done by custom scripts written in Python 3.7 Anaconda with Numpy, Pandas and  
177 pyABF modules. These scripts are available at <https://github.com/Sylvain-Deposit/PNG-Entropy>.

### 178 **3 Export to PNG format**

179 Export to PNG was made with 3 different softwares: i) Anaconda 3.7  
180 (<https://www.anaconda.com/>) and the pyPNG package (<https://pypi.org/project/pypng/>) for  
181 Figures 1, 2A, 3A, 3B ; ii) Labview 2017 and Vision 2017 (National Instruments) for Figures  
182 2B, 3C, 4A and 4B; iii) the FIJI distribution of ImageJ software (Rueden et al., 2017; Schindelin  
183 et al., 2012) for figure 4C. Signals were normalized to 256 values from 0 to 255 simply by  
184 subtracting the minimal value of the signal, then dividing by the maximal value and multiplying  
185 by 255. It was then saved as PNG format in 8-bits range (256 grey values). For figure 2B and 3C,  
186 as the signal was binnarized we saved it with a 1-bit range (2 grey values).

187 A minimal file of PNG format is composed of a header and several parts of data, named critical  
188 chunks (<https://www.w3.org/TR/PNG/#5DataRep>). To these minimum requirements it is  
189 possible to add ancillary chunks (<https://www.w3.org/TR/PNG/#11Ancillary-chunks>) containing  
190 various information such as Software name, ICC profile, pixels dimensions, etc... If useful, this  
191 is hindering the estimation of entropy as it represents an overhead to the final size of the file. To  
192 estimate this overhead for each of our software we saved an image of 100 \* 100 values of zeros,  
193 which corresponds to black in 8-bits grey levels and has an entropy of 0. With pyPNG, Fiji and  
194 Labview we obtained three PNG files of size 90, 90 and 870 Bytes, respectively. When repeating  
195 the experiment of figure 1, we obtained really similar linear fits of slopes 1.21 ( $R^2 = 0.99$ ), 1.18  
196 ( $R^2 = 0.99$ ) and 1.21 ( $R^2 = 0.99$ ) respectively.

197 For Figure 4C, we used Fiji for every image of the collection and we: i) extracted the channel  
198 number 2 containing the MAP2 staining; ii) converted the file to 8-bits grey levels; iii)  
199 thresholded it to remove every intensity values under 10 to remove most of the background; iv)  
200 saved the new file as PNG format, v) checked the size of this new file and vi) divided the size in  
201 kBytes by the number of soma visible in the field.

## 202 **3 Results**

### 203 **1 Entropy and application to Gaussian noise**

204 To test the usability of the PNG format to represent entropy, we started by generating 10 000  
205 points of uniform white noise with an amplitude N of 2. As we are using white noise, we fully  
206 know the probability distribution (in that case,  $p(xi) = 1/N$ ) and we can apply the eq. 1 and  
207 obtain an entropy H of 1 bit. We then repeated this noise model progressively increasing the

208 amplitude by squares of 2 until 256, which corresponds to a maximum entropy of 8 bits (Figure  
209 1A). The entropy rate  $R$  is defined as  $R = \frac{1}{T}H$  with  $T$  being the sampling of the signal. In this  
210 model case, we can take  $T = 1$  to finally obtain an entropy rate in bits per samples.

211 As a control way to calculate the entropy of our signals, we used the quadratic extrapolation  
212 method which compensate for the sampling disaster (Juusola and de Polavieja, 2003; Panzeri et  
213 al., 2007; de Polavieja et al., 2005; Strong et al., 1998). Briefly, this method requires slicing our  
214 signal by multiple factors “Size”, quantizing it into multiple levels “ $v$ ” of amplitudes, creating  
215 the probability distribution of words made of multiple combinations “ $T$ ” of bins and finally  
216 calculating the entropy of the signal from this probability distribution. We thus obtain a great  
217 number of entropy values that we plot successively against  $1/\text{Size}$ ,  $1/v$  and  $1/T$  in order to fit  
218 them with quadratic extrapolations and find the intersection to 0 (Figure 1B, see Methods). By  
219 this triple extrapolation, we can estimate the entropy rate of the signal for theoretical infinite size,  
220 infinite quantization levels and infinite combination of sample bins as

$$221 \quad 222 \quad R = \lim_{T \rightarrow \infty} \frac{1}{T} \lim_{v \rightarrow \infty} \lim_{\text{Size} \rightarrow \infty} H^{T,v,\text{Size}} \quad (\text{eq.2})$$

223 In our simple model, we can see that when using only 2 different values, the final extrapolation  
224 to 0 gives an entropy rate really close to 1 as expected (Figure 1B, right panel).

225 However, when increasing the number of possible values until 256 (entropy  $H$  of 8) we start to  
226 unravel the so-called “sampling disaster” (Figure 1C). When performing the last extrapolation  
227 (Figure 1C, right panel), even if the upper bound has the correct value of 8 (most right point), a  
228 linear fit can be done only on the 2 last points and the intersection to 0 gives a value of around  
229 5.7, far from the expected one. This is easily explained by the number of data points we have in  
230 our model signal. The last extrapolation concerns the “ $T$ ” combinations of values to calculate the  
231 entropy rate and when using Gaussian white noise and with  $T$  equal to 1, it means we need  $2^8 =$   
232 256 samples to properly estimate the probability distribution. However, if  $T$  increases to 2 we  
233 then need  $2^{8*2} = 65536$  samples to estimate the probability distribution, when we had only 10000.  
234 The probability distribution is thus insufficient to properly estimate the entropy rate of this signal  
235 with 256 values. Even by using quadratic extrapolations to compensate for the sampling bias, we  
236 can see that the direct method gives a wrong result for high entropy values and few data points  
237 (red arrowheads in Figure 1D, left panel).

238 As a comparison, we simply saved the 10 000 samples data of increasing noise as PNG image  
239 file with a depth of 8 bits (and thus 256 possible values) and measured the space taken by these  
240 files on the hard drive (Figure 1D, right panel). We obtained a linear increase versus the ideal  
241 entropy value of equation ( $y = 1.199x + 0.609$ ,  $R^2 = 0.99$ ). The PNG compression algorithm  
242 works with linearized data, which means there is no difference when saving pictures as a 100 \*  
243 100 square format (figure 1D, right panel, squares plot) or saving a 10 000 single line (same

244 [panel, crosses plot](#)). Noticeably, there is no sampling disaster when using this method. From this  
245 first test, we can conclude that the size of a PNG file of a model signal has a linear relationship  
246 with its entropy rate. And that this measure is not biased by the sampling disaster.

247 As another example to better illustrate the concept of entropy and the effect of PNG conversion,  
248 we choose to generate 10 000 points of uniform white noise of amplitude 4 (thus an entropy  $H$  of  
249 2 bits. [Figure 2A, top left](#)) and compare it to the really same signal, but with sorted values  
250 ([Figure 2A, bottom left](#)). These two signals look drastically different but they have the same  
251 probability distribution and if we use the Shannon's formula (eq. 1), they both have the same  
252 entropy. However, when the signal is sorted the uncertainty of each value is drastically reduced.  
253 By knowing any value we have a good guess of what will be the next one, so its entropy should  
254 be close to 0. This is exactly what happens when using the quadratic extrapolation to correct the  
255 sampling bias: the signal made of uniform white noise keeps its entropy of 2 bits, but the sorted  
256 signal sees its entropy reduced to 0.0048 bits per pixel ([Figure 2A, middle](#)). We then multiplied  
257 the size of the signal by 2 and 4 (thus 20 000 and 40 000 points): this does not change the  
258 probability distribution of the values and thus the entropy values stay low (Entropy of 0.0001 and  
259 0.0016 bits per pixel, respectively) ([Figure 2A, middle](#)).

260 The PNG algorithm works by removing statistical redundancy in the signal, but by definition  
261 there is no redundancy in a signal made of uniform white noise. As a result, when we increase  
262 the size of the random signal by a factor 2 or 4 we increase the size of the corresponding file by  
263 the same factor (File sizes of 3.2, 7.1 and 14 kB, respectively) ([Figure 2A, right](#)). If we use the  
264 sorted signal, the redundancy is maximal and thus the file size is much smaller, showing the  
265 decrease in entropy. If we increase the size of this signal, we increase the redundancy and thus  
266 the file size stays low (File sizes of 0.13, 0.12 and 0.16 kB, respectively) ([Figure 2A, right](#)).

267 The entropy of a signal is independent of the mean value of this signal, as it is calculated from a  
268 probability distribution of values and not from the values themselves. To demonstrate that the  
269 PNG format behaves in the same way, we generated 10 000 points of uniform white noise with 2  
270 possible values (0 and 1) and progressively increased the percentage of 1 in this signal, from 0 to  
271 100% ([Figure 2B, left](#)). If we calculate the entropy of this signal by the Shannon's formula (eq.1),  
272 we obtain the classical bell-shaped curve as described by ([Shannon, 1948](#)) ([Figure 2B, right](#)). We  
273 simply saved these signals to PNG format and measured the size of the file on the hard drive, and  
274 we could see that this size follows the same curve than the entropy ([Figure 2B, right](#)).

275 From these examples, we conclude that correcting the sampling bias is critical to capture the  
276 entropy of a signal. We showed that the PNG conversion method does capture the intrinsic  
277 organization of a signal, that it follows its entropy and is independent of the values of the signal  
278 itself. However, the different signals need to be of the same size if we want to estimate their  
279 entropy by PNG conversion.



## 280 2 Mutual Information and application to electrophysiological data

281 Most of the time, the experimenter is not interested in the entropy itself, but in the mutual  
282 information between two variables X and Y. The mutual information “ $I_{XY}$ ” measures the  
283 statistical dependence by the distance to the independent situation (Cover and Thomas, 2006;  
284 Shannon, 1948) given by

$$285 \quad I_{XY} = \sum_{i,j} p(x_i, y_j) \log_2 \left( \frac{p(x_i, y_j)}{p(x_i)p(y_j)} \right) \quad (\text{eq.3})$$

286 Therefore, when X and Y are independent  $p(x_i, y_j) = p(x_i) * p(y_j)$ , so  $I_{XY} = 0$  bits.

287 The mutual information can also be rewritten as the difference between the entropy of X and the  
288 conditional entropy of X given Y:

$$289 \quad I_{XY} = H(X) - H(X/Y) \quad (\text{eq.4})$$

290 Where  $H(X)$  is the entropy already described (eq.1) and

$$291 \quad H(X/Y) = - \sum_j p(y_j) \sum_i p(x_i, y_j) * \log_2 p(x_i, y_j) \quad (\text{eq.5})$$

292 Interestingly, if we consider a neuron stimulated repetitively by the same stimulus, we can define  
293 X as the response of the neuron to the stimulus and Y as the stimulus received by the neuron  
294 (Borst and Theunissen, 1999). In that case,  $H(X)$  can be interpreted as the total entropy  
295 (quantifying the average variability of the neuron response during one trial), also called  $H_S$ .  
296  $H(X/Y)$  can be interpreted as the noise entropy  $H_N$ , quantifying the variability of the neuron  
297 response across the trials. In that case,

$$298 \quad I_{SN} = H_S - H_N \quad (\text{eq.6})$$

299 Where  $H_S$  is the average entropy of every trial and:

$$300 \quad H_N = - \langle \sum_i p(x_i)_\tau * \log_2 p(x_i)_\tau \rangle_\tau \quad (\text{eq.7})$$

301 where  $p(x_i)_\tau$  is the probability of finding the configuration  $x_i$  at a time  $\tau$  over all the acquired  
302 trials of an experiment (Juusola and de Polavieja, 2003; de Polavieja et al., 2005; Strong et al.,  
303 1998). Finally, we can obtain the information rate R, by using the quadratic extrapolation method  
304 and dividing by the time sampling, as:

$$305 \quad R = R_S - R_N = \lim_{T \rightarrow \infty} \frac{1}{T} \lim_{v \rightarrow \infty} \lim_{Size \rightarrow \infty} (H_S^{T,v,Size} - H_N^{T,v,Size}) \quad (\text{eq.8})$$

306 In practical terms, this means to acquire multiple recordings of the same experiments, apply the  
307 quadratic extrapolation method first on each trial and average the results to obtain  $R_S$ . Then, to

308 apply the same method across the trials for every time  $\tau$  and average the results to obtain  $R_N$ . The  
309 information rate  $R$  is thus the mutual information between the stimulation protocol and the  
310 acquired trials.

311 In order to apply this method to electrophysiological signals, we created a single compartment  
312 model in NEURON 7.7. The model was stimulated using various numbers of EPSPs with  
313 amplitudes chosen randomly in a log-normal distribution described in (Lefort et al., 2009). Each  
314 synapse stimulated the model once during a simulation and the time onset was randomly chosen.  
315 We ran 20 trials of the simulation with the same train of synapses (Figure 3A, left). In order to  
316 introduce some randomness in the spiking, a small Gaussian noise current was also injected  
317 (Figure 3A, left, See Methods). We calculated  $R_S$  and  $R_N$  using the quadratic extrapolation  
318 method. (Figure 3A, middle) and subtracting  $R_N$  to  $R_S$  to obtain the information rate (Figure 3A,  
319 right). We then reproduced this protocol with increasing numbers of synapses to obtain different  
320 spiking frequencies. As expected, when we increased the number of synapses we increased the  
321 spiking frequency and the mutual information between our stimulation and the response (Figure  
322 3A, right). This measure follows a linear trend, really similar to what was already described in  
323 literature (Juusola and de Polavieja, 2003; de Polavieja et al., 2005).

324 As already described, the PNG format is line-wise. The compression algorithm will thus be  
325 sensitive to the orientation of the image we have to compress. To estimate the entropy of the  
326 signal, we started by converting our voltage signals to an 8-bits PNG image (256 levels of grey).  
327 As our signals are 20 trials of 5s at 10 kHz sampling, this yielded a 50 000 \* 20 pixels of 256  
328 grey scale image (Figure 3B, left). We saved this first version of the image and measured the size  
329 of the files on the hard drive. To estimate the entropy of the noise, we simply rotated the image  
330 90 degrees and saved it again to PNG format. This constrains the algorithm to calculate the  
331 entropy through the acquired trials and not through the signal itself, thus estimating the entropy  
332 of the noise through every trials (Figure 3B, middle). We measured the size of the newly  
333 generated file and subtracted it to the previously measured for the signal entropy. As we can see,  
334 this difference of file size follows a linear behavior, increasing with AP frequency similarly to  
335 the direct measure of the information rate (Figure 3B, right).

336 As a second example, we reproduced the protocol made by (London et al., 2002) to estimate the  
337 information transfer between one synapse and the postsynaptic neuron. We stimulated the model  
338 with 750 of the synapses described above to get a spiking frequency around 5Hz and added a  
339 supplementary synapse stimulating the model every 200 ms. The EPSP size of this synapse  
340 (wSyn\_supp) was modified at each simulation. When wSyn\_supp was weak, this synapse did not  
341 drive the spiking of the model (Figure 3C, up left). When wSyn\_supp was strong, this synapse  
342 drove the spiking of the model (Figure 3C, down left). We made 100 trials for each wSyn\_supp  
343 and at each trial the onset time and amplitude of the others synapses were chosen randomly. We  
344 down-sampled our signal to 3 kHz and binarized it to 0 and 1, depending on the presence of APs  
345 or not similarly to (London et al., 2002). After calculating the Information rate using the  
346 quadratic extrapolation method, we obtained a sigmoid curve similar to what they described

347 (London et al., 2002) (Figure 3C, middle). In a similar way than above, we converted our voltage  
348 signals to a 1-bit PNG image (2 levels of grey). As our signals are 100 trials of 5s at 3 kHz  
349 sampling, this yielded an image of 15 000 \* 100 pixels of 2 possible values. We measured the  
350 size of the file, then rotated the image 90 degrees, saved it again and measured the size of this  
351 new file. As expected, the difference between the sizes of these two files follows a sigmoid curve  
352 really similar to the one calculated by the quadratic extrapolation method (Figure 3C, right).

353 From this second test, we conclude that by saving multiple trials of the same experiment as a  
354 single PNG file, we can estimate the entropy of the signal. And by simply rotating this same file  
355 90 degrees and saving it again, we can estimate the entropy of the noise. The difference between  
356 those two values follows the same behavior than measuring the Mutual Information between the  
357 stimulation protocol and the multiple recorded responses.

### 358 **3 Application to 2D images**

359 Another way to understand entropy is that it is a representation of complexity of a signal (Cover  
360 and Thomas, 2006). For example, (Wagstaff and Corsetti, 2010) used the PNG compression  
361 algorithm to evaluate the complexity of biogenic and abiogenic stromatolites. As a quick  
362 example, we took one of the famous drawings of a cortical column by Santiago Ramon y Cajal  
363 (Cajal, 1899) (Figure 4A, top, Wikimedia Commons). We saved each 1-pixel column of this  
364 picture as an 8-bits PNG file and measured its size on the hard drive. As we see, the size of the  
365 columns as PNG files changes with the different layers of the cortical stack, illustrating the  
366 differences in cell density and dendrites arborizations (Figure 4A, bottom).

367 In the same spirit, we used the ddAC Neuron example from the FIJI distribution of the ImageJ  
368 software (Schindelin et al., 2012). This reconstructed drosophila neuron (Figure 4Ba) is a classic  
369 example used for Sholl analysis (Ferreira et al., 2014; Sholl, 1953), (see  
370 [https://imagej.net/Sholl\\_Analysis](https://imagej.net/Sholl_Analysis)). This analysis estimates the complexity of an arborization by  
371 drawing concentric circles centered on the soma of the neuron and counting the number of  
372 intersections between those circles and the dendrites. The more intersections, the more complex  
373 is the dendritic tree. As we need PNG files with the same dimensions to be able to compare their  
374 sizes, we realized a cylindrical anamorphosis centered on the soma of the ddAC neuron (Figure  
375 3Bb) and saved each column of this new rectangular image as PNG files. As a result, the size of  
376 those files grew with the distance from soma, reaching the same peak than a Sholl analysis made  
377 with default settings in Fiji (Figure 4Bc). Of course, it is also possible to simply tile the original  
378 image in smaller PNG files and save them independently. The size of these files will give an idea  
379 of the complexity of the area covered by the tile (Figure 4Bd).

380 In a final example, we used a group of images made by Dieter Brandner and Ginger Withers  
381 available in the Cell Image Library (<http://cellimagelibrary.org/groups/3006>). These images are  
382 under Creative Common Attribution Licence and show the growth of neuronal cultures from 2 to  
383 7 days In-Vitro. They show two stainings, for tubulin and MAP2. They are suitable to our needs

384 as all the images have the same dimensions and resolution. We kept only the MAP2 channel as it  
385 reveals the dendrite morphology, converted the images to 8-bits grey scale (256 grey levels) and  
386 thresholded them to remove the background (Figure 4C, left and middle). We then saved all the  
387 images to PNG, measured the size of the files on the hard drive and divided this number by the  
388 number of visible somas, in order to make a quick normalization by the culture density. As  
389 expected, this ratio File Size / Number of Cells increases with the number of days in culture,  
390 revealing the dendrite growth (Figure 4C, right).

391 From this third test, we showed that we can use the PNG format to estimate the entropy of 2D  
392 images as well, and this can be used to estimate dendrite growth or local complexity of an image.

## 393 **4 Discussion**

394 Entropy measurement can be a tool of choice in neuroscience, as it applies to many different  
395 types of data; it can capture nonlinear interactions, and is model independent. However, an  
396 accurate measure can be difficult as it is prone to a sampling bias depending of the size of the  
397 recorded signal, its quantization levels and its sampling. There are multiple ways to compensate  
398 for it, but none them trivial. In this paper, we showed that it is possible to estimate the entropy  
399 rate of neuroscience data simply by compressing them in PNG format and measuring the size of  
400 the file on the hard drive. The principle relies on the Source Coding Theorem specifying that one  
401 cannot compress a signal more than its entropy multiplied by its size. We showed first that the  
402 size of PNG files correlates linearly with the entropy of signals made of Uniform white noise.  
403 Then that we can estimate the information transfer rate between a stimulation protocol and the  
404 measured response simply by saving the responses as a PNG file, measuring the size and  
405 subtracting the size of the same file rotated 90 degrees. And finally, that we can generally use the  
406 PNG format to estimate complexity of two-dimensional data like neuronal arborization and in  
407 histological stainings.

### 408 **1 Drawbacks**

409 The main drawback of this method is that the PNG file size is not the absolute value of the  
410 entropy of the signal. Even if entropy bits and computer bytes do share similar names, in no  
411 cases should we exchange one for the other. A PNG file size is a way to estimate the evolution of  
412 entropy, considering all other parameters unchanged. As so, PNG files must be all of the same  
413 dimensions, of the same dynamic range and saved with the same software. A PNG file is  
414 composed of a header, critical chunks and non-essential ancillary chunks (See Methods).  
415 Different software will save different data in the ancillary chunks and thus will change the size of  
416 the file, independently of the compressed signal.

## 417            **2 Advantages**

418    The main advantage of this method is that it relies on previously developed compression  
419    algorithms that were already shown as optimal (Huffman, 1952). Moreover, it does not need any  
420    specialized software or any knowledge in programming language, as the PNG format is  
421    ubiquitous in informatics. For example, the ImageJ software is widely used in neuroscience and  
422    can export data as PNG.

423    A second advantage is the speed of execution. As an example, the Information Rate of neuronal  
424    signals (Figure 3A & B) took a bit more than 2 hours of calculation for the quadratic  
425    extrapolation method. Saving the same signals in PNG took less than 30 seconds.

426    As so, this method is extremely easy, quick, and does not need any knowledge in mathematics  
427    for correcting the sampling bias. It is interesting to note that an experimenter will often acquire  
428    multiple recordings of the same protocol in order to infer proper statistics. This means that most  
429    of the times no supplementary experiments are needed to calculate the entropy of a signal, or the  
430    information transfer rate between a stimulation protocol and its recorded result.

431    In conclusion, we propose this method as a quick-and-easy way to estimate the entropy of a  
432    signal or the information transfer rate between stimulation and recorded signals. It does not give  
433    the exact value of entropy or information, but it is related to it in a linear way and its evolution  
434    through different parameters follows a linear trend as well. And it is not affected by the sampling  
435    bias inherent to the direct way of calculating entropy.

## 436            **3 Developments**

437    We see multiple ways to improve this method. First, we saved our data as 8-bits PNG files,  
438    which limits the dynamic range of the file to 256 values. However, it is possible to save PNG  
439    natively as 1, 4, 8, 16 and 24 bits range, thus greatly increasing the dynamic range of the saved  
440    signal. Second, with some programming skills it is possible to remove the header and ancillary  
441    chunks of the PNG format, thus removing the size overhead (but the file will be unreadable by  
442    standard softwares). Finally, one possible way of improving the estimation of entropy rate would  
443    be to choose a better compression algorithm. We choose the PNG format as it is widely used by  
444    common softwares and it is based on LZSS and Huffman algorithms, which have been proven  
445    optimal. However, some algorithms may give a better compression rate depending on the quality  
446    of the data. As an example, the Rice compression algorithm was originally developed for the  
447    NASA Voyager missions (Rice and Plaunt, 1971). It is suboptimal but is better suited for noisy  
448    signals of low values.

449    In a more general direction, it is important to note that this method works with any entropy-  
450    coding compression algorithm, as long as they are loss-less. This is the case of GZip algorithms  
451    for example, used in many compression softwares such as WinRAR, PKZIP, ARJ, etc... It is

452 thus not limited to pictures in PNG, although this format is useful for rotating the file and  
453 estimating the mutual information easily. Moreover, we apply these algorithms to 2D images,  
454 when actually the algorithm linearizes the data and works only in linear way on one dimension.  
455 There are some attempts to generalize Shannon entropy to 2D space (Larkin, 2016), but they are  
456 out of the scope of this paper.

## 457 **5 References**

- 458 Bialek, W., Rieke, F., Steveninck, R. de R. van, and Warland, D. (1991). Reading a neural code.  
459 *Science* 252, 1854–1857.
- 460 Bian, N., Liang, F., Fu, H., and Lei, B. (2019). A Deep Image Compression Framework for Face  
461 Recognition. ArXiv190701714 Cs.
- 462 Borst, A., and Theunissen, F.E. (1999). Information theory and neural coding. *Nat. Neurosci.* 2,  
463 947–957.
- 464 Cajal, S.R. (1899). Comparative study of the sensory areas of the human cortex.
- 465 Cover, T., and Thomas, J. (2006). *Elements of Information Theory*, 2nd Edition | Wiley.
- 466 Deutsch, P. (1996). DEFLATE Compressed Data Format Specification version 1.3.
- 467 Ferreira, T.A., Blackman, A.V., Oyrer, J., Jayabal, S., Chung, A.J., Watt, A.J., Sjöström, P.J.,  
468 and van Meyel, D.J. (2014). Neuronal morphometry directly from bitmap images. *Nat. Methods*  
469 11, 982–984.
- 470 Hou, Y., Zheng, L., and Gould, S. (2020). Learning to Structure an Image with Few Colors.  
471 ArXiv200307848 Cs.
- 472 Hu, W., Tian, C., Li, T., Yang, M., Hou, H., and Shu, Y. (2009). Distinct contributions of Nav1.6  
473 and Nav1.2 in action potential initiation and backpropagation. *Nat. Neurosci.* 12, 996–1002.
- 474 Huffman, D.A. (1952). A Method for the Construction of Minimum-Redundancy Codes. *Proc.*  
475 *IRE* 40, 1098–1101.
- 476 Ince, R.A.A., Giordano, B.L., Kayser, C., Rousset, G.A., Gross, J., and Schyns, P.G. (2017). A  
477 statistical framework for neuroimaging data analysis based on mutual information estimated via  
478 a gaussian copula. *Hum. Brain Mapp.* 38, 1541–1573.
- 479 Ito, S., Hansen, M.E., Heiland, R., Lumsdaine, A., Litke, A.M., and Beggs, J.M. (2011).  
480 Extending Transfer Entropy Improves Identification of Effective Connectivity in a Spiking  
481 Cortical Network Model. *PLoS ONE* 6.
- 482 Juusola, M., and de Polavieja, G.G. (2003). The rate of information transfer of naturalistic  
483 stimulation by graded potentials. *J. Gen. Physiol.* 122, 191–206.

- 484 Larkin, K.G. (2016). Reflections on Shannon Information: In search of a natural information-  
485 entropy for images. ArXiv160901117 Cs Math.
- 486 Larsson, N.J. (1996). Extended Application of Suffix Trees to Data Compression. In In Data  
487 Compression Conference, pp. 190–199.
- 488 Larsson, N.J. (1999). Structures of String Matching and Data Compression. thesis/docmono.  
489 Lund University.
- 490 Lefort, S., Tomm, C., Floyd Sarria, J.-C., and Petersen, C.C.H. (2009). The excitatory neuronal  
491 network of the C2 barrel column in mouse primary somatosensory cortex. *Neuron* 61, 301–316.
- 492 London, M., Schreibman, A., Häusser, M., Larkum, M.E., and Segev, I. (2002). The information  
493 efficacy of a synapse. *Nat. Neurosci.* 5, 332–340.
- 494 Magri, C., Whittingstall, K., Singh, V., Logothetis, N.K., and Panzeri, S. (2009). A toolbox for  
495 the fast information analysis of multiple-site LFP, EEG and spike train recordings. *BMC*  
496 *Neurosci.* 10, 81.
- 497 Mentzer, F., Van Gool, L., and Tschannen, M. (2020). Learning Better Lossless Compression  
498 Using Lossy Compression. ArXiv200310184 Cs Eess.
- 499 Nemenman, I., Bialek, W., and de Ruyter van Steveninck, R. (2004). Entropy and information in  
500 neural spike trains: progress on the sampling problem. *Phys. Rev. E Stat. Nonlin. Soft Matter*  
501 *Phys.* 69, 056111.
- 502 Paninski, L. (2003). Convergence properties of three spike-triggered analysis techniques. *Netw.*  
503 *Bristol Engl.* 14, 437–464.
- 504 Panzeri, S., and Treves, A. (1996). Analytical estimates of limited sampling biases in different  
505 information measures. *Netw. Bristol Engl.* 7, 87–107.
- 506 Panzeri, S., Senatore, R., Montemurro, M.A., and Petersen, R.S. (2007). Correcting for the  
507 sampling bias problem in spike train information measures. *J. Neurophysiol.* 98, 1064–1072.
- 508 de Polavieja, G.G., Harsch, A., Kleppe, I., Robinson, H.P.C., and Juusola, M. (2005). Stimulus  
509 history reliably shapes action potential waveforms of cortical neurons. *J. Neurosci. Off. J. Soc.*  
510 *Neurosci.* 25, 5657–5665.
- 511 Rice, R., and Plaunt, J. (1971). Adaptive Variable-Length Coding for Efficient Compression of  
512 Spacecraft Television Data. *IEEE Trans. Commun. Technol.* 19, 889–897.
- 513 Rueden, C.T., Schindelin, J., Hiner, M.C., DeZonia, B.E., Walter, A.E., Arena, E.T., and Eliceiri,  
514 K.W. (2017). ImageJ2: ImageJ for the next generation of scientific image data. *BMC*  
515 *Bioinformatics* 18, 529.
- 516 Safaai, H., Onken, A., Harvey, C.D., and Panzeri, S. (2018). Information estimation using  
517 nonparametric copulas. *Phys. Rev. E* 98.

- 518 Schindelin, J., Arganda-Carreras, I., Frise, E., Kaynig, V., Longair, M., Pietzsch, T., Preibisch, S.,  
519 Rueden, C., Saalfeld, S., Schmid, B., et al. (2012). Fiji: an open-source platform for biological-  
520 image analysis. *Nat. Methods* 9, 676–682.
- 521 Shannon, C.E. (1948). A Mathematical Theory of Communication. *Bell Syst. Tech. J.* 27, 379–  
522 423.
- 523 Sholl, D.A. (1953). Dendritic organization in the neurons of the visual and motor cortices of the  
524 cat. *J. Anat.* 87, 387–406.
- 525 Storer, J.A., and Szymanski, T.G. (1982). Data compression via textual substitution. *J. ACM* 29,  
526 928–951.
- 527 Street, S. (2020). Upper Limit on the Thermodynamic Information Content of an Action  
528 Potential. *Front. Comput. Neurosci.* 14, 37.
- 529 Strong, S.P., Koberle, R., de Ruyter van Steveninck, R.R., and Bialek, W. (1998). Entropy and  
530 Information in Neural Spike Trains. *Phys. Rev. Lett.* 80, 197–200.
- 531 Timme, N.M., and Lapish, C. (2018). A Tutorial for Information Theory in Neuroscience.  
532 *ENeuro* 5.
- 533 Vicente, R., Wibral, M., Lindner, M., and Pipa, G. (2011). Transfer entropy—a model-free  
534 measure of effective connectivity for the neurosciences. *J. Comput. Neurosci.* 30, 45–67.
- 535 Wagstaff, K.L., and Corsetti, F.A. (2010). An evaluation of information-theoretic methods for  
536 detecting structural microbial biosignatures. *Astrobiology* 10, 363–379.
- 537 Wiegand, T. (2010). Source Coding: Part I of Fundamentals of Source and Video Coding. *Found.*  
538 *Trends® Signal Process.* 4, 1–222.

539

## 540 **6 Funding**

541 This work was funded by Marie-Curie Fellowship IF-746247 Astromodulation, by the Wellcome  
542 Trust Principal Fellowship (212251/Z/18/Z), and by the ERC Proof of Principle grant (767372 –  
543 NEUROCLOUD).

## 544 **7 Acknowledgements**

545 We thank Q. Bernard, C. Leterrier, V. Marra, T. Jensen, K. Zheng for helpful discussion.

546



## 547 **Figure Legends**

### 548 **1 Figure 1: comparison of entropy and PNG file size on a model case.**

549 A) Examples of 10 000 data points of uniform white noise with growing number of grey levels  
550 and growing entropy (here showed as square picture signals). Left: 2 possible grey values, or  
551 entropy of 1. Right: 256 possible grey values, or entropy of 8.

552 B) Direct calculation and quadratic extrapolations to 0 to calculate the entropy rate of the left  
553 signal in A). Left: Plotting all the entropy values to  $1/\text{Size}$  and extrapolating to 0 to get the value  
554 for infinite size (white arrowhead). For clarity, only the condition for  $v = 2$  is shown. Middle:  
555 plotting the obtained values at left to  $1/v$  and extrapolating to 0 to get the value for infinite  
556 number of binning (white arrowhead). Right: plotting the final values to  $1/T$  and extrapolating to  
557 0 to get the value for infinite number of combinations of letters (black arrowhead). Note that this  
558 value is really close to 1, as expected when using a signal made of uniform white noise with 2  
559 possible values.

560 C) Direct calculation and quadratic extrapolations to 0 to calculate the entropy rate of the right  
561 signal in A). Left: Only the condition for  $v = 2$  is shown. Note that in the final graph (right),  
562 points do not follow a linear trend. When using the last 2 points for extrapolation to 0, the value  
563 is far from the expected value of 8 (red arrowhead).

564 D) Left: when plotted against the known entropy value, the quadratic extrapolation method  
565 shows examples of sampling disaster for high values of entropy (red arrowheads). Right: when  
566 simply saving all the signals described in A), the file size in kBytes shows a linear relationship  
567 with the signal entropy ( $y = 1.199x + 0.609$ ,  $R^2 = 0.99$ ). Not that this true for pictures made  
568 either of square signals (squares plot) or linearized signals (crosses plot) and there is no sampling  
569 disaster with this method.

### 570 **2 Figure 2: Effect of redundancy and signal size on entropy and PNG file** 571 **size.**

572 A) Left, Top: Example of 10 000 data points of uniform white noise with 4 levels (entropy of 2  
573 bits, here showed as square picture signals). Left, Bottom: the same signal, with sorted values. If  
574 we use the Shannons's formula for calculating entropy, both signals have an entropy of 2 bits.  
575 Middle: Effect of sampling bias correction and size of the signal on the entropy value. With the  
576 Shannon's formula, both random and sorted signals have the same entropy value (crosses plot).  
577 If we correct the sampling bias with the quadratic extrapolation method, the entropy of the sorted  
578 signal decreases dramatically (squares plot). In both cases, changing the size of the signal does  
579 not change the entropy value, as it does not change the probability distribution of each value in  
580 the signal. Right: As the PNG algorithm compresses by removing statistical redundancy in the  
581 signal, the file size will grow with the size of the random signal. A sorted signal has a maximal  
582 redundancy and thus its file size will stay almost constant when increasing the signal size.

583 **B)** Left: Example of multiple signals of 10 000 data points (here showed as square picture signals)  
584 with 2 possible grey levels (or 0 and 1) and a growing percentage of white (or 1). Right: Direct  
585 entropy calculation of these signals (grey dashed line) and normalized PNG file size as a  
586 comparison (black line).

### 587 **3 Figure 3: Comparison of information rate and PNG file size on a** 588 **neuronal model.**

589 **A)** Left: example of 20 generated trials with the same synaptic activity. Due to the injection of a  
590 small Gaussian noise current, we obtain variability in the spiking of the different trials. Arrows  
591 show the direction used with the quadratic extrapolation method to calculate the signal entropy  
592 ( $R_S$ ) and noise entropy ( $R_N$ ). Middle: calculation of the Entropy Rate of the Signal ( $R_S$ ) and the  
593 noise ( $R_n$ ) for the full voltage of the cell for each condition. The Information transfer Rate  $R$  is  
594 the difference between  $R_S$  and  $R_n$ . Right: Information transfer Rate between the synaptic  
595 stimulation and the neuronal activity, versus the spiking frequency. This follows a linear trend  
596 ( $y = 25.935 x + 188.15$ ,  $R^2 = 0.97$ ).

597 **B)** Left: Conversion of the modeled trials in A) as a 256 grey values PNG file. As the PNG  
598 conversion algorithm is line-wise, we have to save the image a first time, then rotate it 90  
599 degrees and save it a second time (Middle). Arrows show the direction of compression. Right:  
600 the subtraction of the 2 images sizes follows a linear trend with the spiking frequency ( $y =$   
601  $2.555 x - 4.12$ ,  $R^2 = 0.98$ ).

602 **C)** Left: examples of rastergrams showing the impact of the supplementary synapse on our  
603 neuronal model. With a low synaptic strength ( $w_{Syn\_supp} = 2$  mV, top), this synapse barely  
604 drives the model. With a high synaptic strength ( $w_{Syn\_supp} = 6$ , bottom), the neuron spiking  
605 starts to synchronize with the occurrence of the synapse. Middle: Information transfer Rate  
606 between the activity of the supplementary synapse and the neuronal spiking. As expected, it  
607 follows a sigmoidal behavior. Right: rastergrams were saved as PNG files, rotated 90 degrees  
608 and saved again. The difference of the 2 files sizes follows a similar curve than the Information  
609 transfer Rate.

### 610 **4 Figure 4: Application to 2D data.**

611 **A)** Top: original drawing of a cortical column by Santiago Ramon y Cajal. Arrow: each column  
612 of pixel was saved as a PNG file. Bottom: File size of each column as PNG, revealing the change  
613 in organization and complexity of the different layers.

614 **B)** a: ddAC Neuron from Fiji examples. b: The same neuron after a circular anamorphosis  
615 centered on the soma. Note how the complexity of the dendritic arbor changes versus distance  
616 from soma. Arrow: each column of pixel was saved as a single PNG file. c: file size of these  
617 columns as PNG, showing the growth in complexity of the dendritic arborization (black line). As  
618 a comparison, we performed a Sholl analysis of the same image with default FIJI parameters

619 (grey line). d: the original image was tiled in 10 squares, and each square saved as a PNG file.  
620 The sizes of these files reveal the heterogeneity of the dendritic arborization.

621 **C)** Left and Middle: examples of MAP2 stainings of Brandner and Withers neuronal cultures at 2  
622 and 7 Days In Vitro. Note the growth in dendritic arborization through time. Right: Each image  
623 was saved into a PNG file, and the file size divided by the number of visible somas. This gives  
624 us a file size normalized by the density of the culture. This value increases with the number of  
625 Days In-Vitro, revealing the dendrite growth.

**A**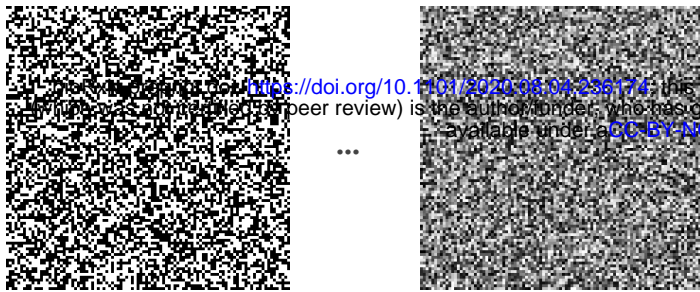**H = 1 (2 grey values)****H = 8 (256 grey values)**

<https://doi.org/10.1101/2020.08.04.236174>; this version posted August 5, 2020. The copyright holder for this preprint (which was not certified by peer review) is the author/funder, who has granted bioRxiv a license to display the preprint in perpetuity. It is made available under aCC-BY-NC 4.0 International license.

**B**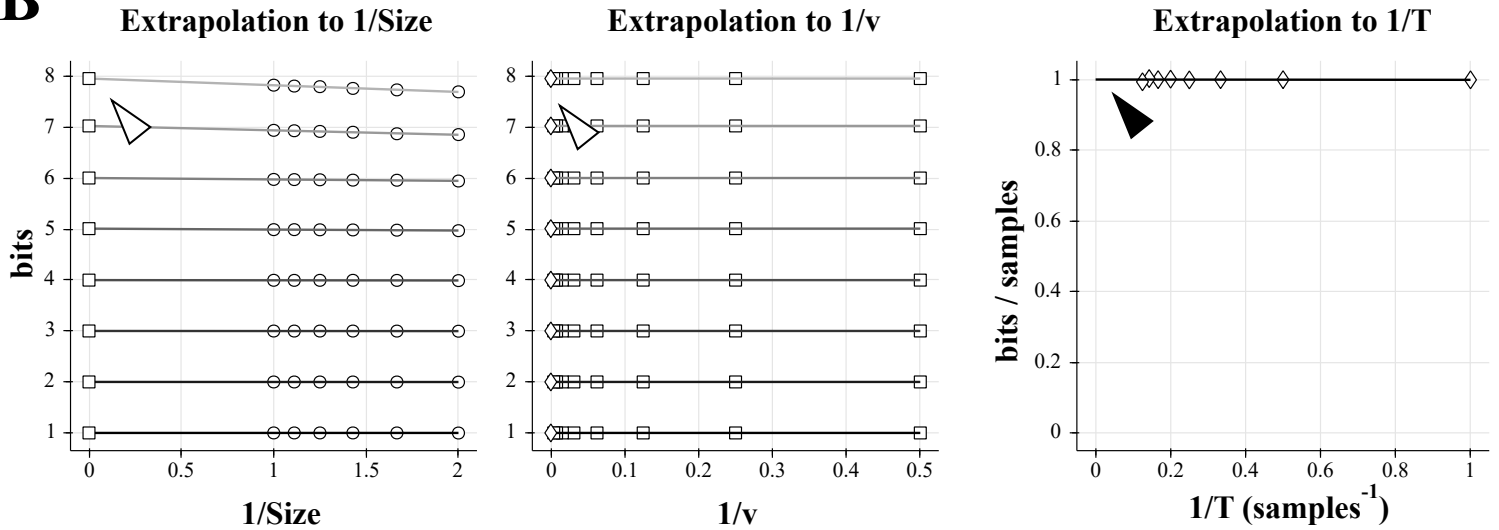**C**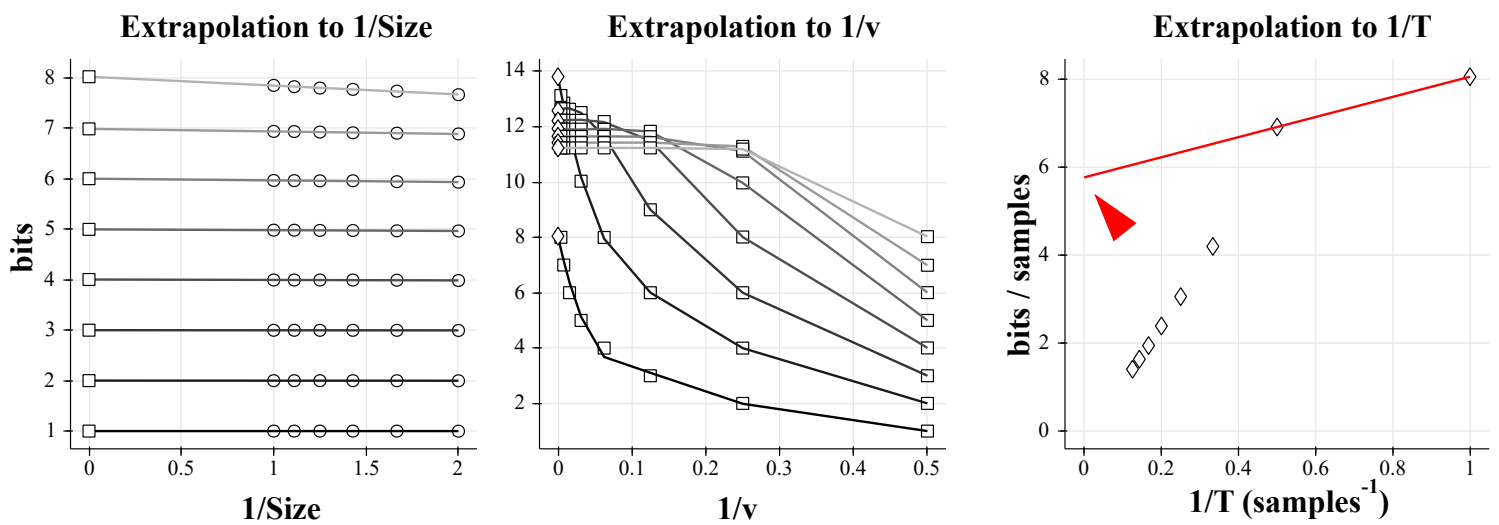**D**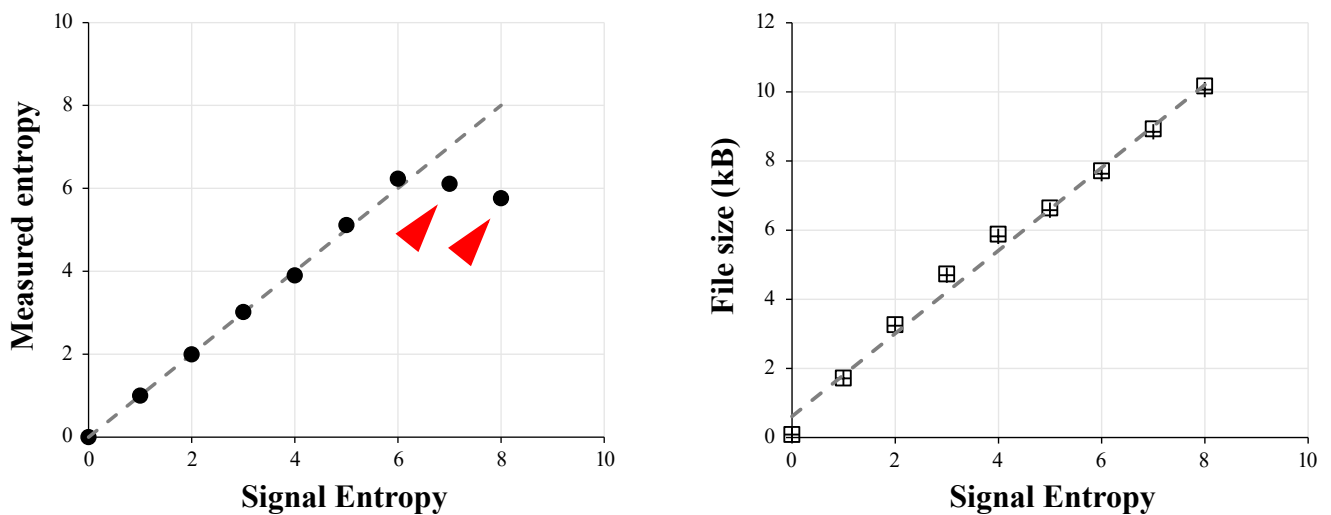

**A****H = 2 (4 grey values)**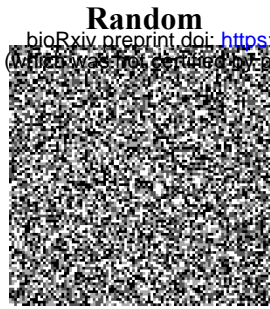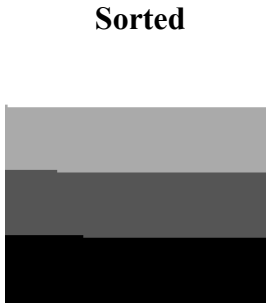

+ Shannon's Formula

□ Correction by quadratic extrapolation

○ PNG conversion

bioRxiv preprint doi: <https://doi.org/10.1101/2020.08.04.236174>; this version posted August 5, 2020. The copyright holder for this preprint (which was not certified by peer review) is the author/funder, who has granted bioRxiv a license to display the preprint in perpetuity. It is made available under aCC-BY-NC 4.0 International license.

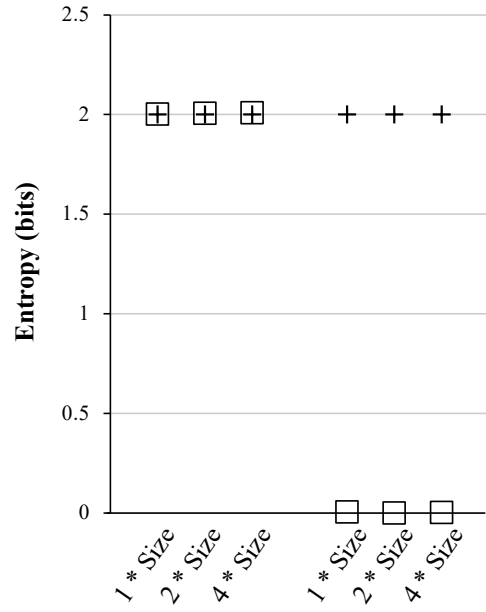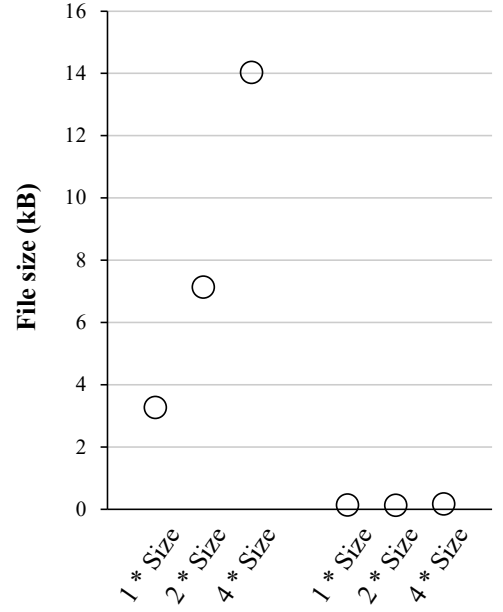**B****Percent of white values**

10 %

50 %

90 %

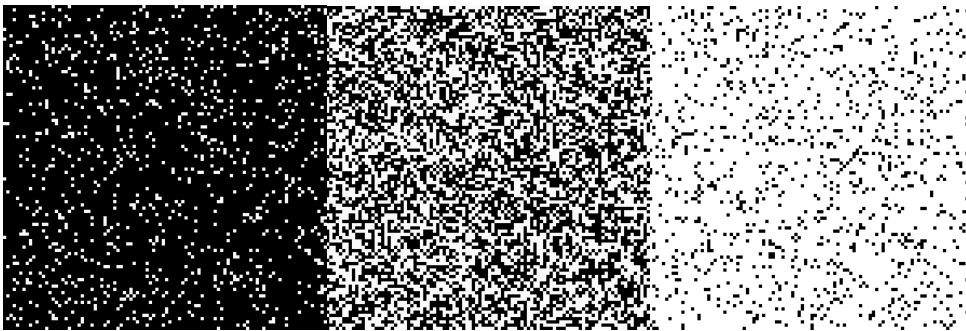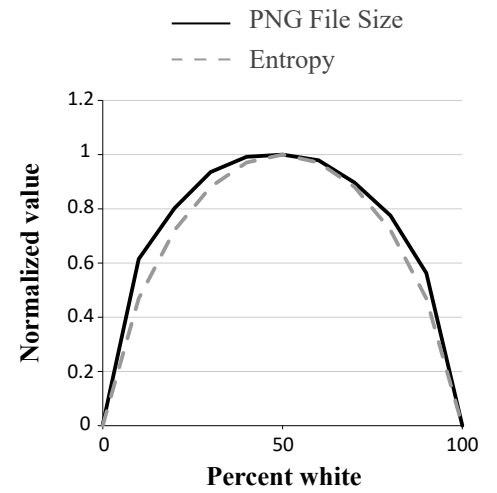

**A**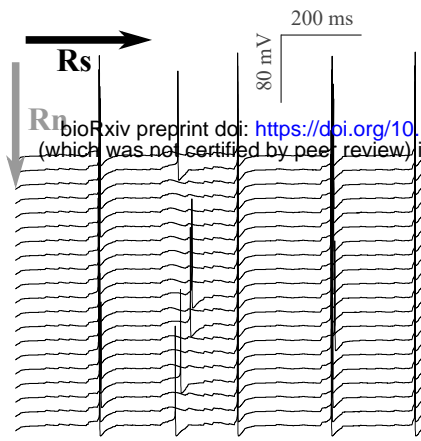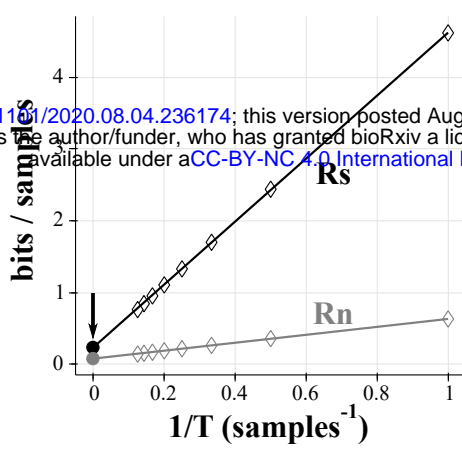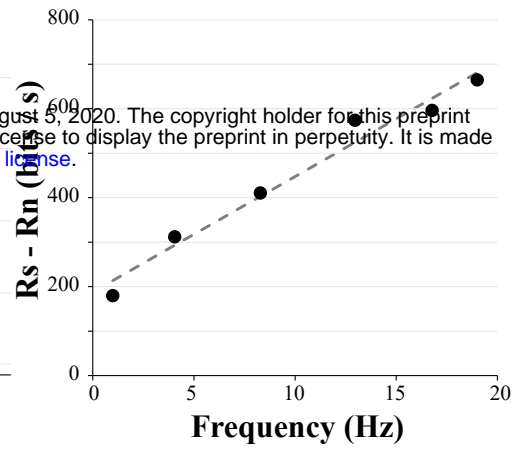**B**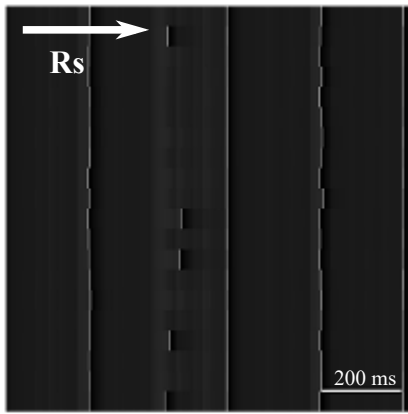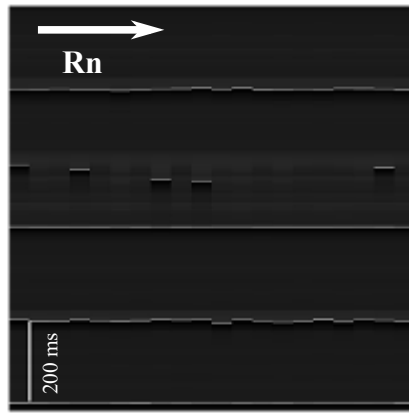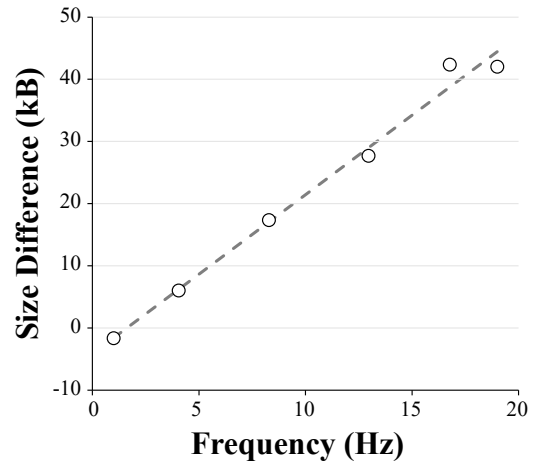**C**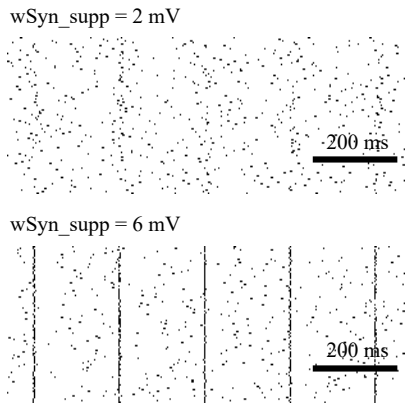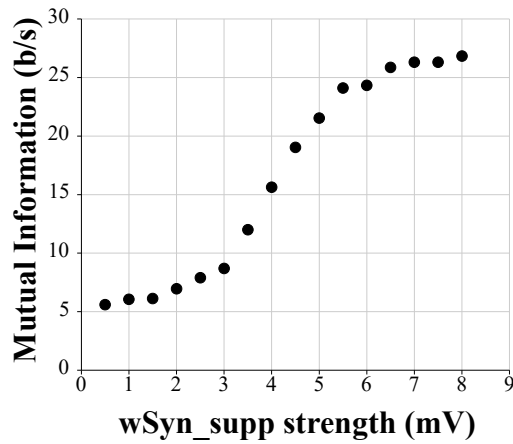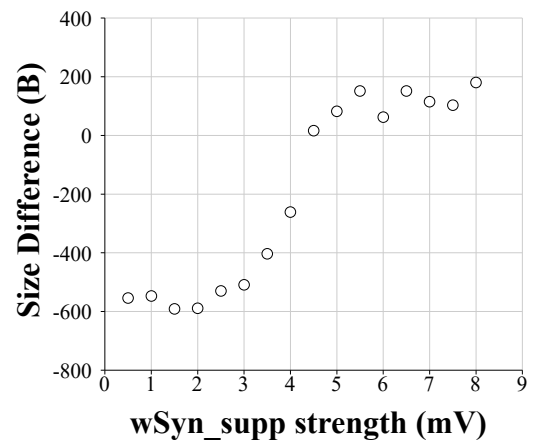

**A**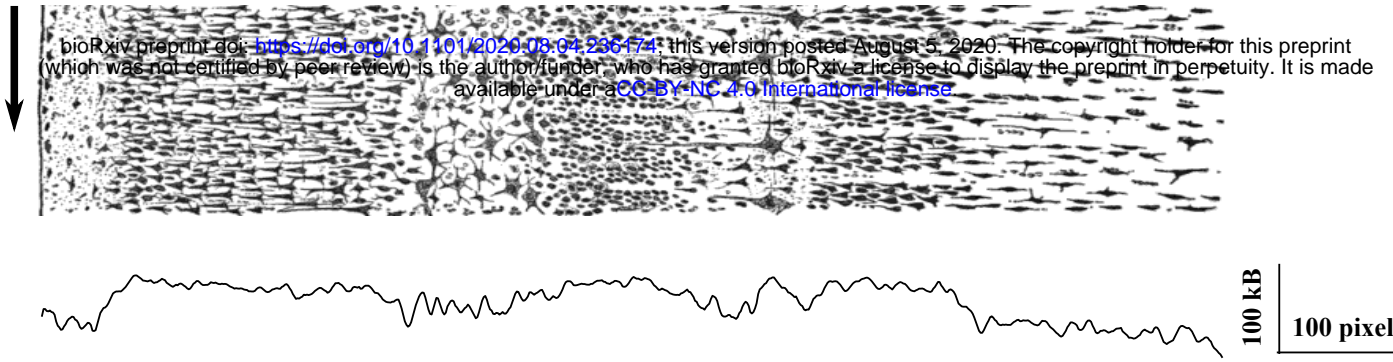**B**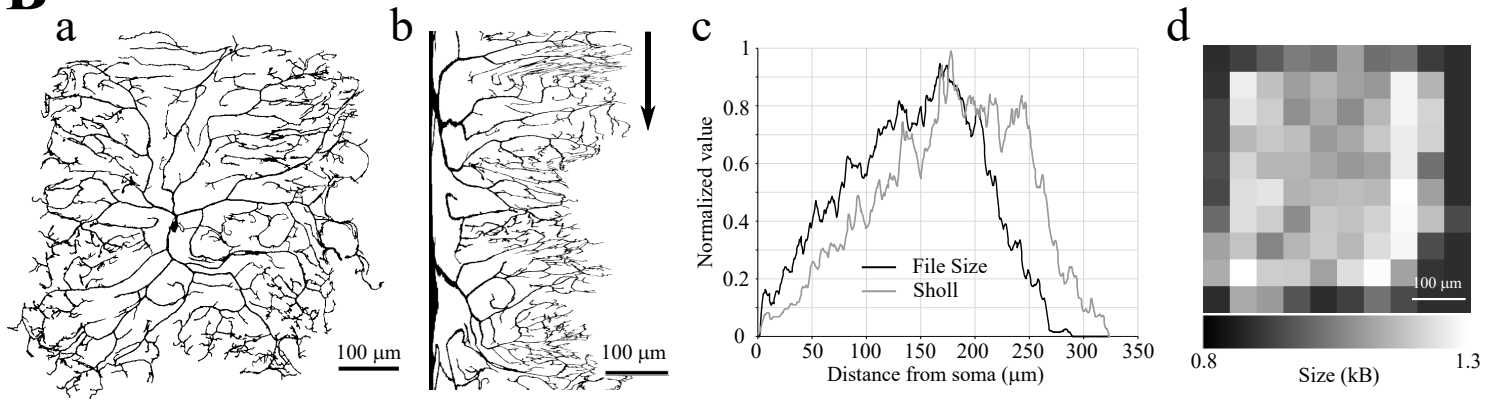**C**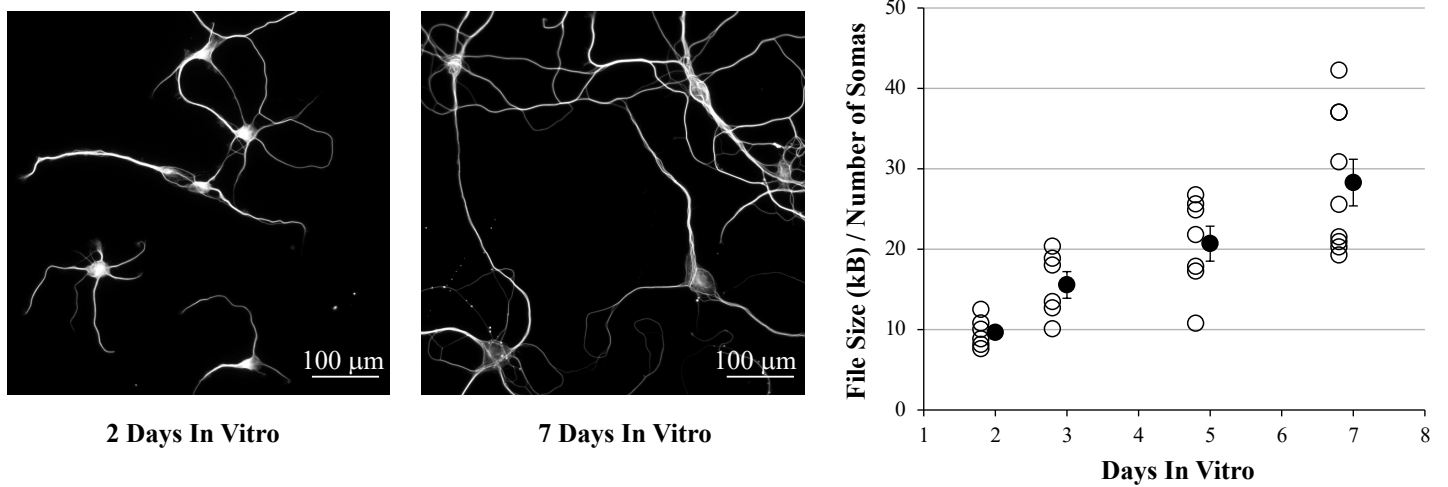

Source: http://biorxiv.org/content/10.1101/2020.08.04.236174v1.full.pdf
